# Supplementary material
Source: Research Square preprint supplement (doi:10.21203/rs.3.rs-9850491/v1)
Supplement: Supplementary file 1 [file 98463fd1c3d5d1a0e672273b.docx]

**Supplementary File 1. AIMAH Educational Validation Questionnaire**

This questionnaire was developed specifically for the present study to evaluate participant perceptions of the AIMAH platform across five domains: clinical realism, educational usefulness, learner engagement, AI feedback quality, and usability. Participants rated each item using a five-point Likert scale.

**Clinical Realism**

1. The AI-simulated patient responses were clinically realistic.
2. The patient interactions resembled authentic clinical encounters.
3. The virtual hospital environment enhanced the realism of the simulation.

**Educational Usefulness**

1. AIMAH supported development of my clinical reasoning skills.
2. AIMAH helped me integrate history-taking and decision-making processes.
3. The platform provided valuable educational experiences.

**Learner Engagement**

1. The simulation environment was engaging.
2. I remained actively involved throughout the learning session.
3. The platform motivated me to continue practicing clinical scenarios.

**AI Feedback Quality**

1. The automated feedback was useful for identifying weaknesses.
2. The feedback helped me understand areas for improvement.
3. The competency assessment was educationally meaningful.

**Usability**

1. The platform was easy to navigate.
2. The user interface was intuitive.
3. Overall system usability was satisfactory.

Likert Scale:

- 1 = Strongly Disagree
- 2 = Disagree
- 3 = Neutral
- 4 = Agree
- 5 = Strongly Agree
